# Supplementary material for: H2 activation by a highly electron-deficient aralkylated organoborane
Source: Royal Society of Chemistry journal article supplement (doi:10.1039/c5dt00821b), 2015-01-01

## Electronic Supplementary Information

### **H<sub>2</sub> Activation By A Highly Electron-Deficient Aralkylated Organoborane**

Peter J. Hill, Thomas J. Herrington, Nicholas H. Rees, Andrew J. P. White and Andrew E. Ashley\*

| <u>Contents</u>                                                                                                                                                                                        | Page |
|--------------------------------------------------------------------------------------------------------------------------------------------------------------------------------------------------------|------|
| 1. Mass spectrometry                                                                                                                                                                                   |      |
| 1.1 [TMPH][HB(CH(C <sub>6</sub> F <sub>5</sub> ) <sub>2</sub> ) <sub>3</sub> ] ( <b>2</b> ) – ES+                                                                                                      | 2    |
| 1.2 [TMPH][HB(CH(C <sub>6</sub> F <sub>5</sub> ) <sub>2</sub> ) <sub>3</sub> ] ( <b>2</b> ) – ES–                                                                                                      | 3    |
| 2. X-ray diffraction                                                                                                                                                                                   |      |
| 2.1 Tris[bis(pentafluorophenyl)methyl]borane, B(CH(C <sub>6</sub> F <sub>5</sub> ) <sub>2</sub> ) <sub>3</sub> ( <b>1</b> )                                                                            | 4    |
| 3. NMR spectroscopy                                                                                                                                                                                    |      |
| 3.1 Bis(pentafluorophenyl)methyl chloride, CHCl(C <sub>6</sub> F <sub>5</sub> ) <sub>2</sub><br>- <sup>1</sup> H, <sup>19</sup> F                                                                      | 5    |
| 3.2 Tris[bis(pentafluorophenyl)methyl]borane, B(CH(C <sub>6</sub> F <sub>5</sub> ) <sub>2</sub> ) <sub>3</sub> ( <b>1</b> )<br>- <sup>1</sup> H, <sup>19</sup> F, <sup>11</sup> B<br>- <sup>13</sup> C | 6    |
| 3.3 [TMPH][HB(CH(C <sub>6</sub> F <sub>5</sub> ) <sub>2</sub> ) <sub>3</sub> ] ( <b>2</b> )<br>- <sup>1</sup> H, <sup>19</sup> F                                                                       | 7    |
| - <sup>11</sup> B, <sup>11</sup> B (hydride region)                                                                                                                                                    | 8    |
| - <sup>13</sup> C                                                                                                                                                                                      | 9    |
| 3.4 Polymerised THF                                                                                                                                                                                    | 10   |
| - <sup>1</sup> H                                                                                                                                                                                       | 10   |

## 1. Mass spectrometry

1.1 (2) [TMPH][HB(CH(C<sub>6</sub>F<sub>5</sub>)<sub>2</sub>)<sub>3</sub>] – ES<sup>+</sup>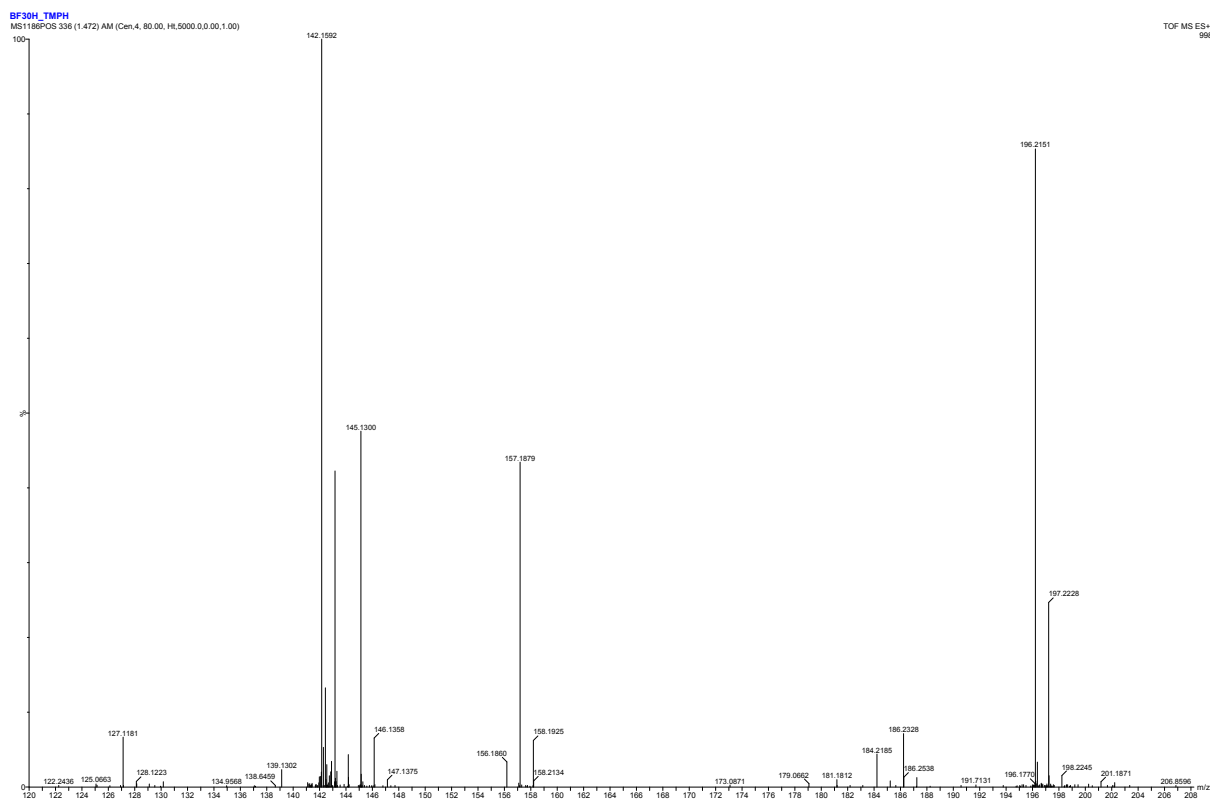

## Elemental Composition Report:

## Single Mass Analysis

Tolerance = 10.0 PPM / DBE: min = -1.5, max = 50.0; Element prediction: Off; Number of isotope peaks used for i-FIT = 3

## Monoisotopic Mass, Even Electron Ions

94 formula(e) evaluated with 1 results within limits (all results (up to 1000) for each mass)

## Elements Used:

C: 9-9 H: 0-200 N: 0-10 O: 0-20 Na: 0-1

Minimum: -1.5

Maximum: 5.0 10.0 50.0

| Mass     | Calc. Mass | mDa  | PPM  | DBE | i-FIT | i-FIT (Norm) | Formula                          |
|----------|------------|------|------|-----|-------|--------------|----------------------------------|
| 142.1592 | 142.1596   | -0.4 | -2.8 | 0.5 | 130.7 | 0.0          | C <sub>9</sub> H <sub>20</sub> N |

1.3 (2) [TMPH][HB(CH(C<sub>6</sub>F<sub>5</sub>)<sub>2</sub>)<sub>3</sub>] – ES–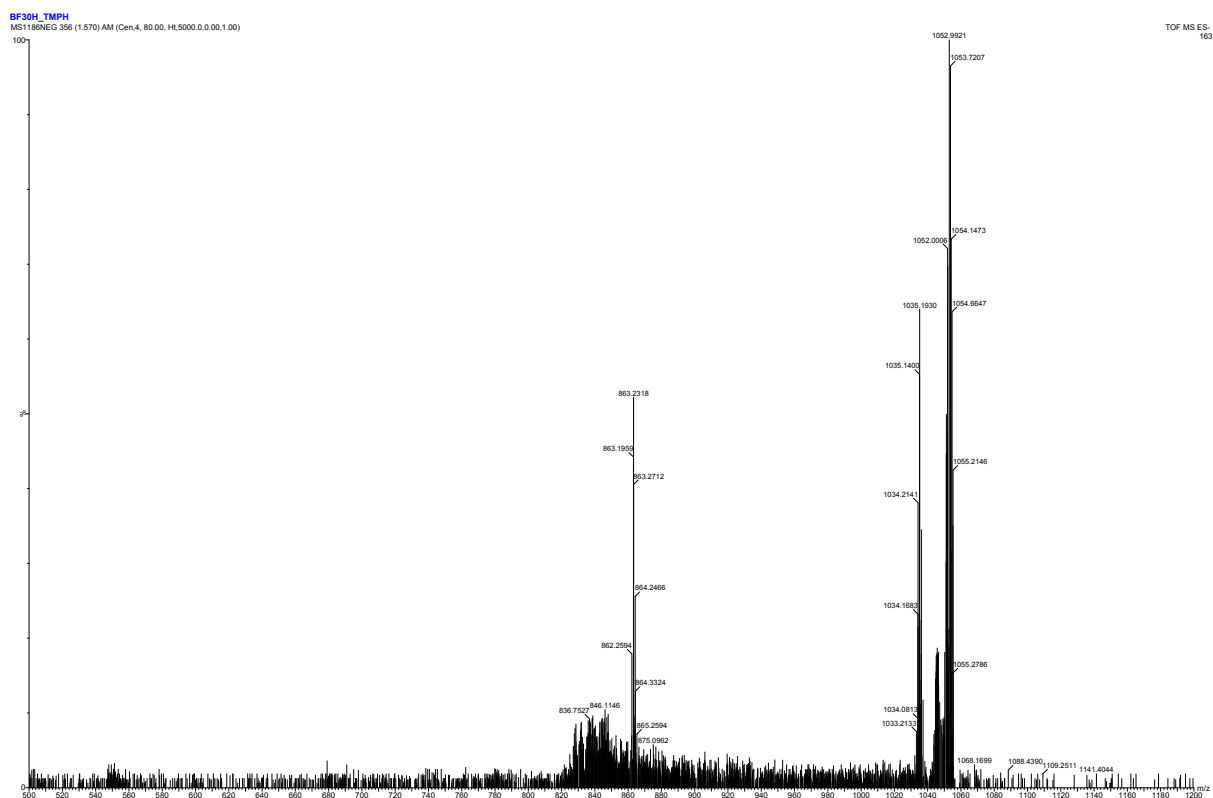

## Elemental Composition Report:

## Single Mass Analysis

Tolerance = 10.0 PPM / DBE: min = -1.5, max = 50.0; Element prediction: Off; Number of isotope peaks used for i-FIT = 3

## Monoisotopic Mass, Even Electron Ions

461 formula(e) evaluated with 1 results within limits (all results (up to 1000) for each mass)

## Elements Used:

C: 39-39 H: 0-200 N: 0-10 O: 0-20 Na: 0-1 F: 30-30 11B: 1-1

Minimum: -1.5

Maximum: 5.0 10.0 50.0

| Mass      | Calc. Mass | mDa  | PPM  | DBE  | i-FIT | i-FIT (Norm) | Formula        |
|-----------|------------|------|------|------|-------|--------------|----------------|
| 1052.9921 | 1052.9927  | -0.6 | -0.6 | 23.5 | 107.7 | 0.0          | C39 H4 F30 11B |

## 2. X-ray diffraction

Crystal data and structure refinement for B(CH(C<sub>6</sub>F<sub>5</sub>)<sub>2</sub>)<sub>3</sub>, (1)

|                                                     |                                                                                       |                           |
|-----------------------------------------------------|---------------------------------------------------------------------------------------|---------------------------|
| Formula                                             | C <sub>39</sub> H <sub>3</sub> BF <sub>30</sub> · 1.5(C <sub>7</sub> H <sub>8</sub> ) |                           |
| Formula weight                                      | 1190.43                                                                               |                           |
| Temperature                                         | 173 K                                                                                 |                           |
| Diffractometer, wavelength                          | OD Xcalibur 3, 0.71073 Å                                                              |                           |
| Crystal system, space group                         | Monoclinic, P 2 <sub>1</sub> /c                                                       |                           |
| Unit cell dimensions                                | $a = 24.3971(7)$ Å                                                                    | $\alpha = 90^\circ$       |
|                                                     | $b = 12.6719(3)$ Å                                                                    | $\beta = 92.764(3)^\circ$ |
|                                                     | $c = 14.5724(5)$ Å                                                                    | $\gamma = 90^\circ$       |
| Volume, <i>Z</i>                                    | 4499.9(2) Å <sup>3</sup> , 4                                                          |                           |
| Density (calculated)                                | 1.757 Mg/m <sup>3</sup>                                                               |                           |
| Absorption coefficient                              | 0.189 mm <sup>-1</sup>                                                                |                           |
| <i>F</i> (000)                                      | 2348                                                                                  |                           |
| Crystal colour / morphology                         | Colourless plates                                                                     |                           |
| Crystal size                                        | 0.48 x 0.44 x 0.14 mm <sup>3</sup>                                                    |                           |
| $\theta$ range for data collection                  | 2.98 to 32.78°                                                                        |                           |
| Index ranges                                        | $-27 \leq h \leq 36$ , $-18 \leq k \leq 17$ , $-21 \leq l \leq 15$                    |                           |
| Reflns collected / unique                           | 50254 / 15102 [ <i>R</i> (int) = 0.0437]                                              |                           |
| Reflns observed [ <i>F</i> > 4σ( <i>F</i> )]        | 10074                                                                                 |                           |
| Absorption correction                               | Analytical                                                                            |                           |
| Max. and min. transmission                          | 0.973 and 0.927                                                                       |                           |
| Refinement method                                   | Full-matrix least-squares on <i>F</i> <sup>2</sup>                                    |                           |
| Data / restraints / parameters                      | 15102 / 126 / 753                                                                     |                           |
| Goodness-of-fit on <i>F</i> <sup>2</sup>            | 1.043                                                                                 |                           |
| Final <i>R</i> indices [ <i>F</i> > 4σ( <i>F</i> )] | <i>R</i> <sub>1</sub> = 0.0878, <i>wR</i> <sub>2</sub> = 0.2337                       |                           |
| <i>R</i> indices (all data)                         | <i>R</i> <sub>1</sub> = 0.1244, <i>wR</i> <sub>2</sub> = 0.2535                       |                           |
| Largest diff. peak, hole                            | 0.457, -0.440 eÅ <sup>-3</sup>                                                        |                           |
| Mean and maximum shift/error                        | 0.000 and 0.001                                                                       |                           |

## 3. NMR

3.1 Bis(pentafluorophenyl)methyl chloride,  $\text{CHCl}(\text{C}_6\text{F}_5)_2$ 

- $^1\text{H}$  NMR ( $\text{CDCl}_3$ , \* indicates solvent peak)

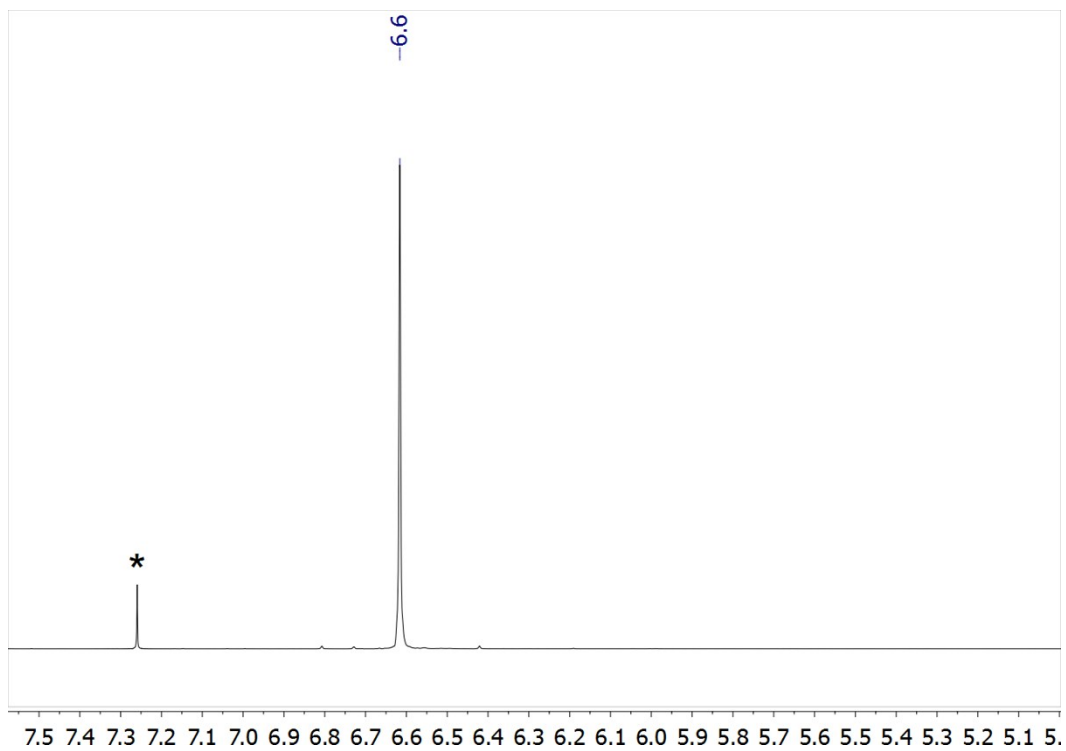

- $^{19}\text{F}$  NMR ( $\text{CDCl}_3$ )

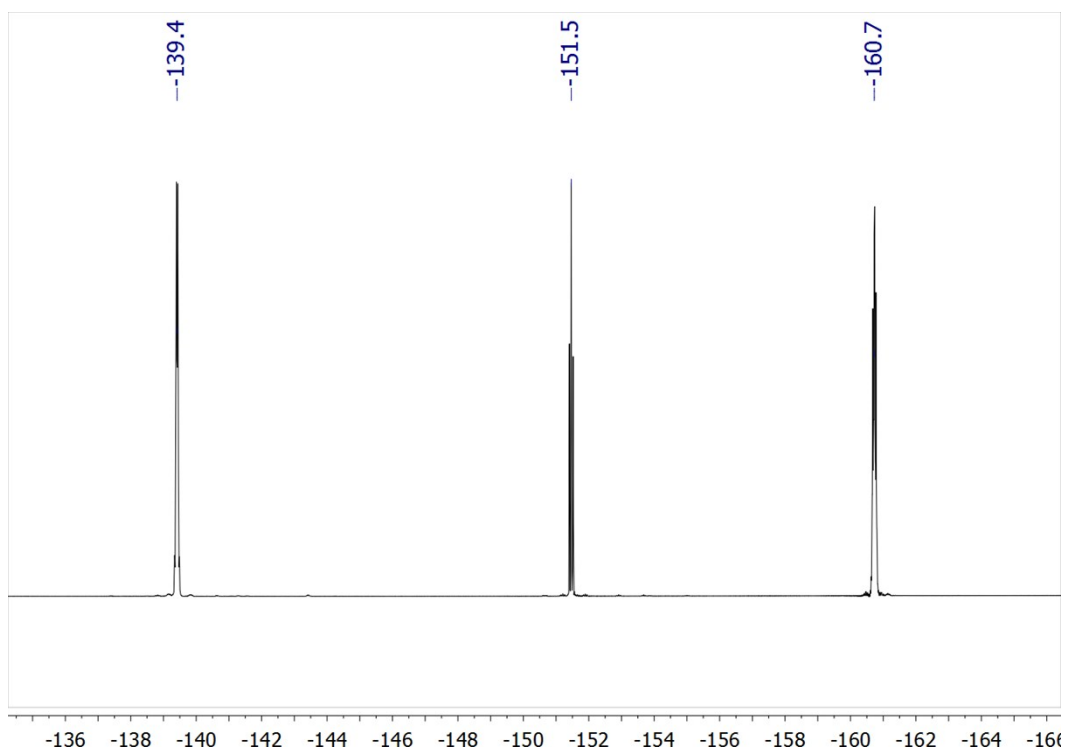

3.2 Tris[bis(pentafluorophenyl)methyl]borane,  $B(CH(C_6F_5)_2)_3$  (**1**)

- $^1H$ ,  $^{19}F$  NMR ( $CD_2Cl_2$ , \* indicates solvent peak)

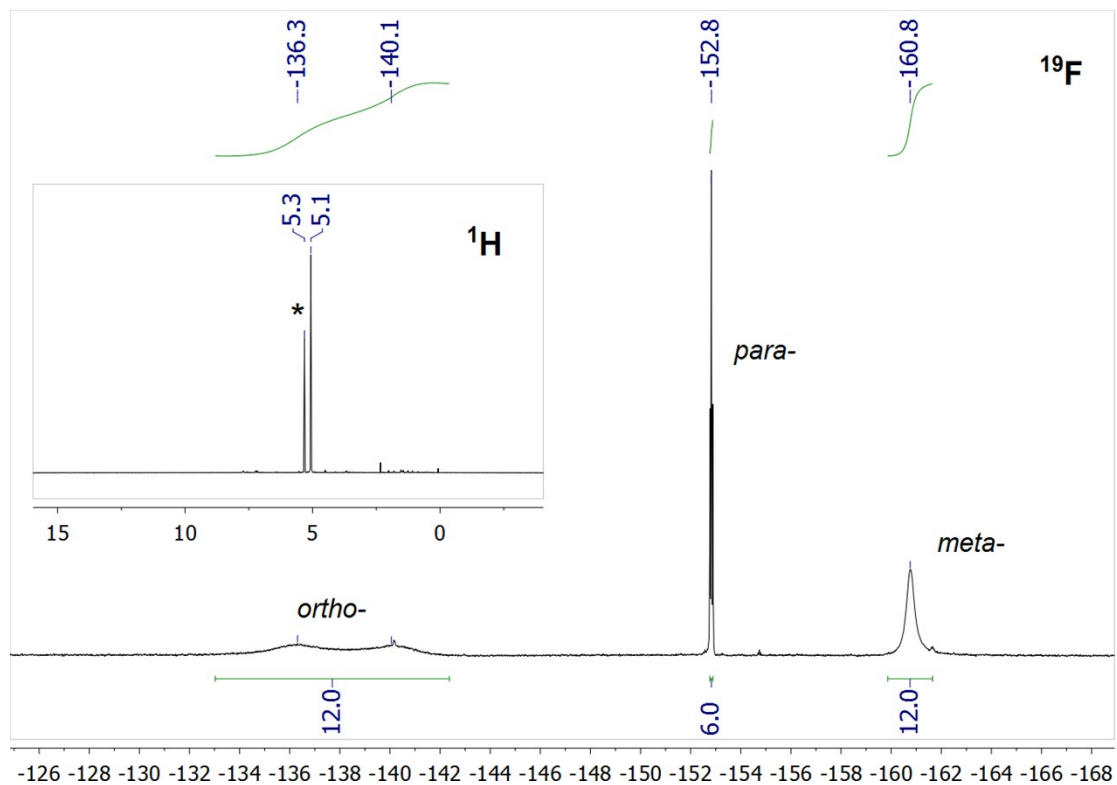

- $^{11}B$   $\{^1H\}$  NMR ( $CD_2Cl_2$ )

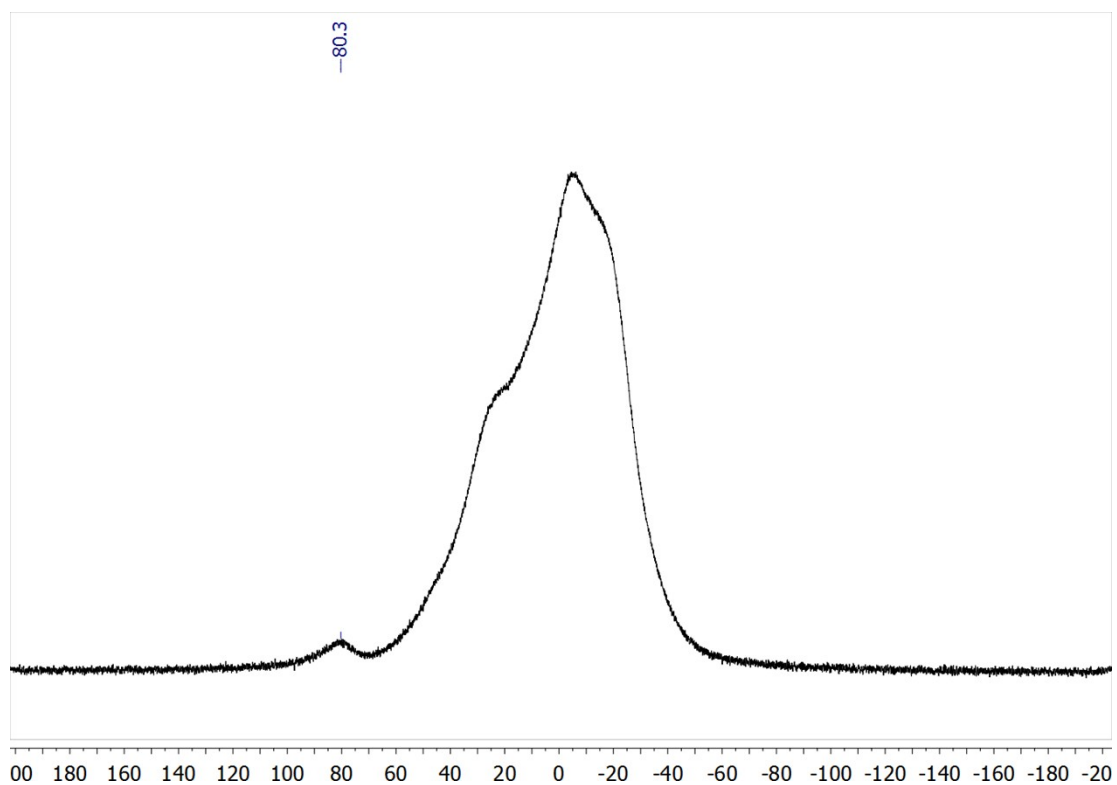

- $^{13}\text{C}$   $\{^1\text{H}\}$  NMR ( $\text{CD}_2\text{Cl}_2$ , aliphatic region, \* indicates solvent peak)

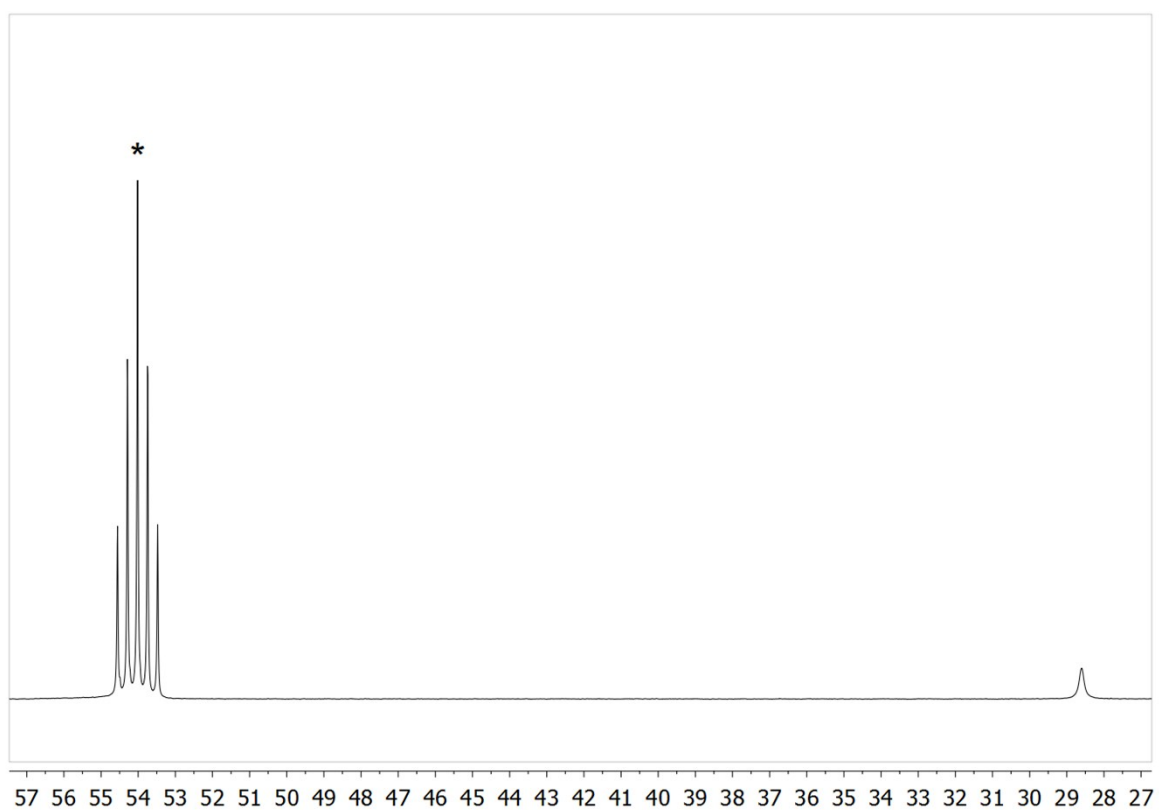

- $^{13}\text{C}$   $\{^1\text{H}\}$  NMR ( $\text{CD}_2\text{Cl}_2$ , aromatic region)

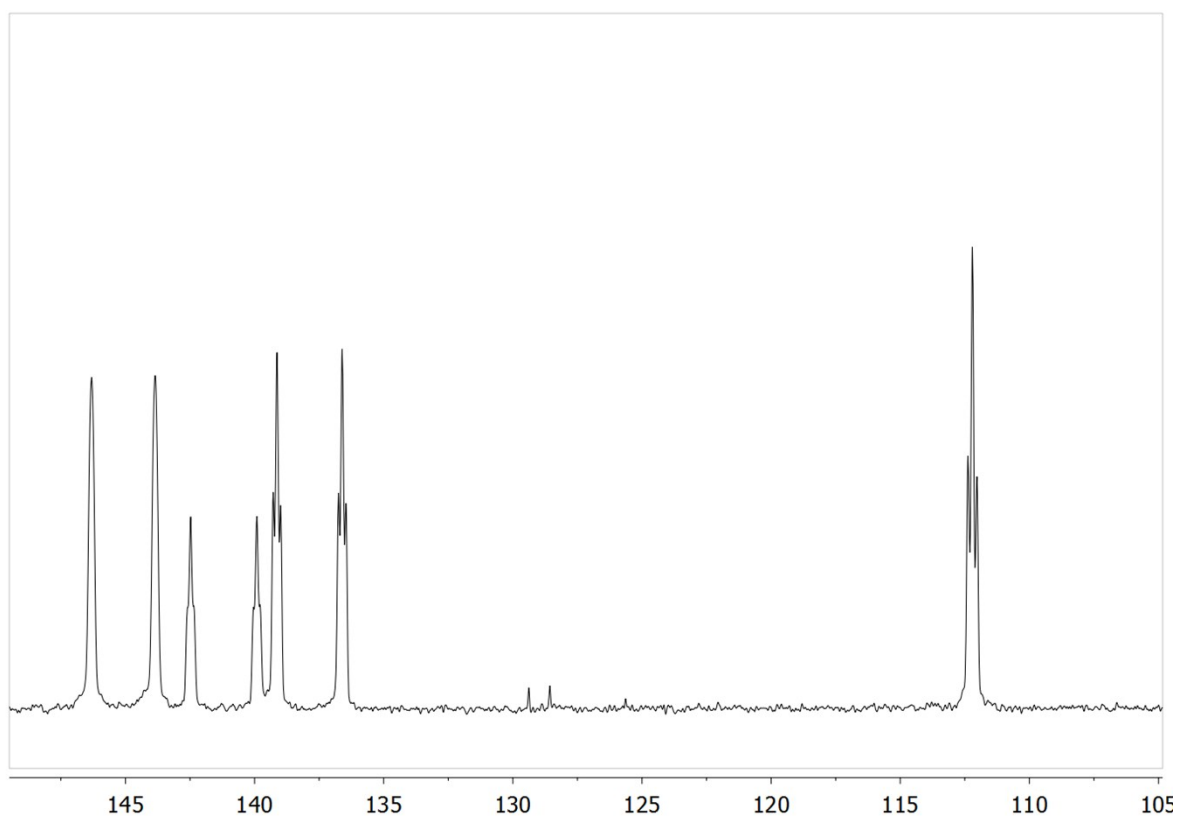

3.3 [TMPH][HB(CH(C<sub>6</sub>F<sub>5</sub>)<sub>2</sub>)<sub>3</sub>] (**2**)

- <sup>1</sup>H NMR (THF-d<sub>8</sub>)

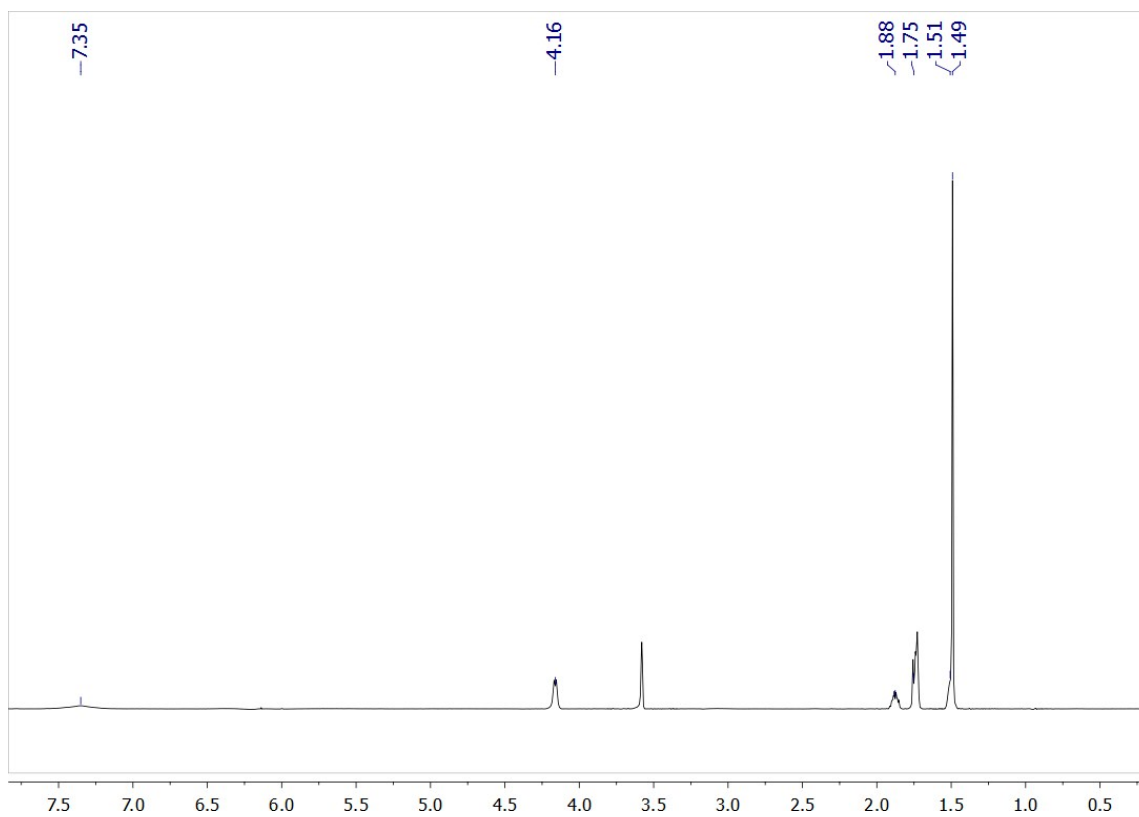

- <sup>19</sup>F NMR (THF-d<sub>8</sub>)

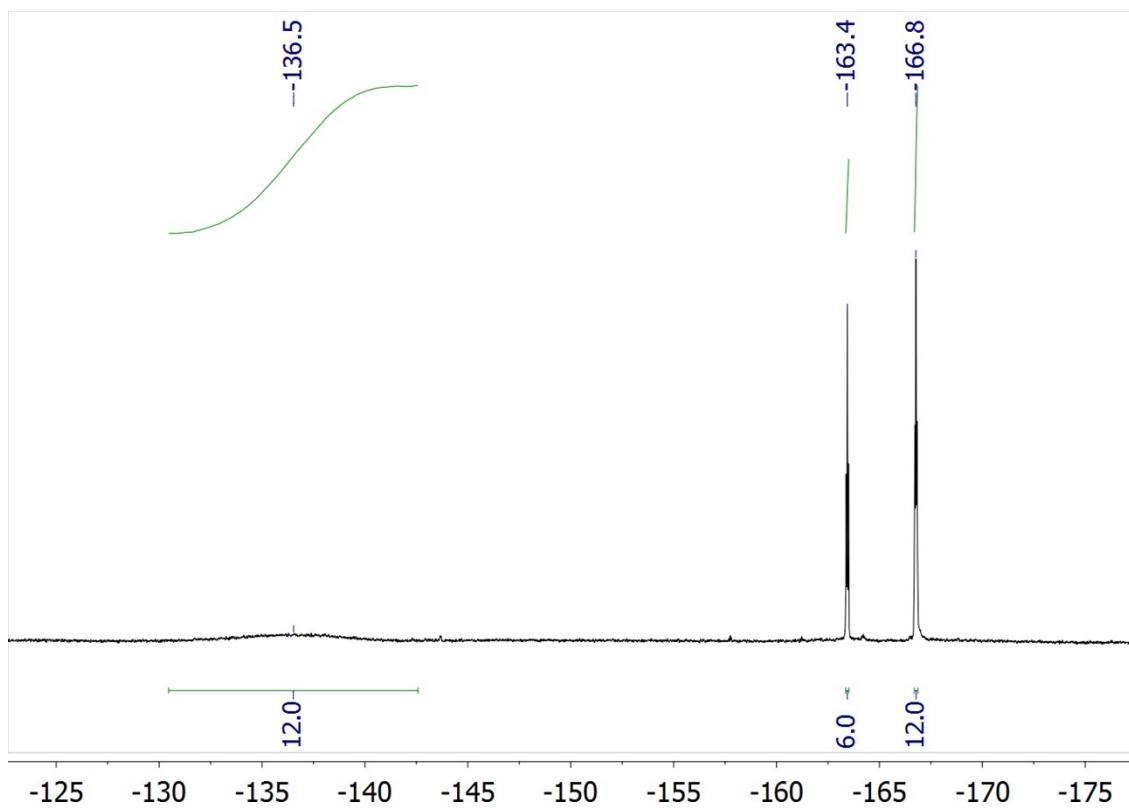



- $^{11}\text{B}$  NMR (THF- $d_8$ )

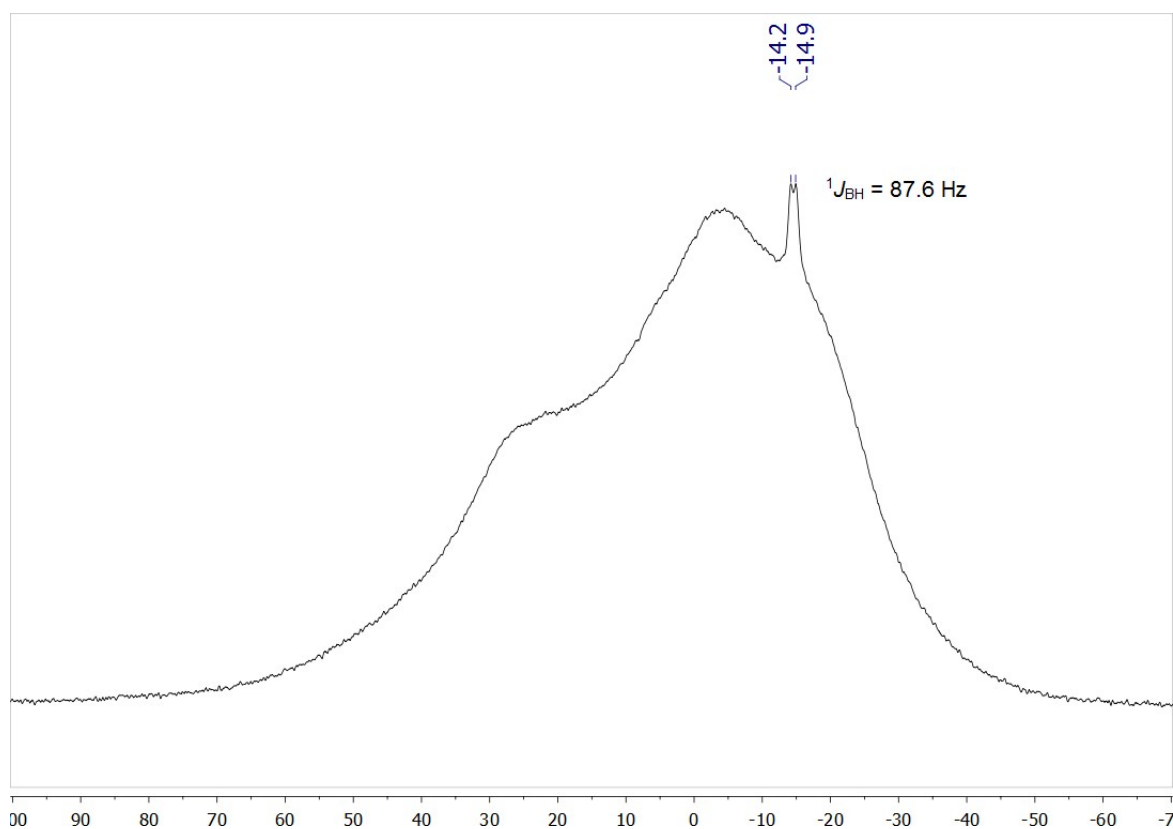

- a)  $^{11}\text{B}$  NMR and b)  $^{11}\text{B}\{^1\text{H}\}$  NMR (THF- $d_8$ ) (borohydride region)

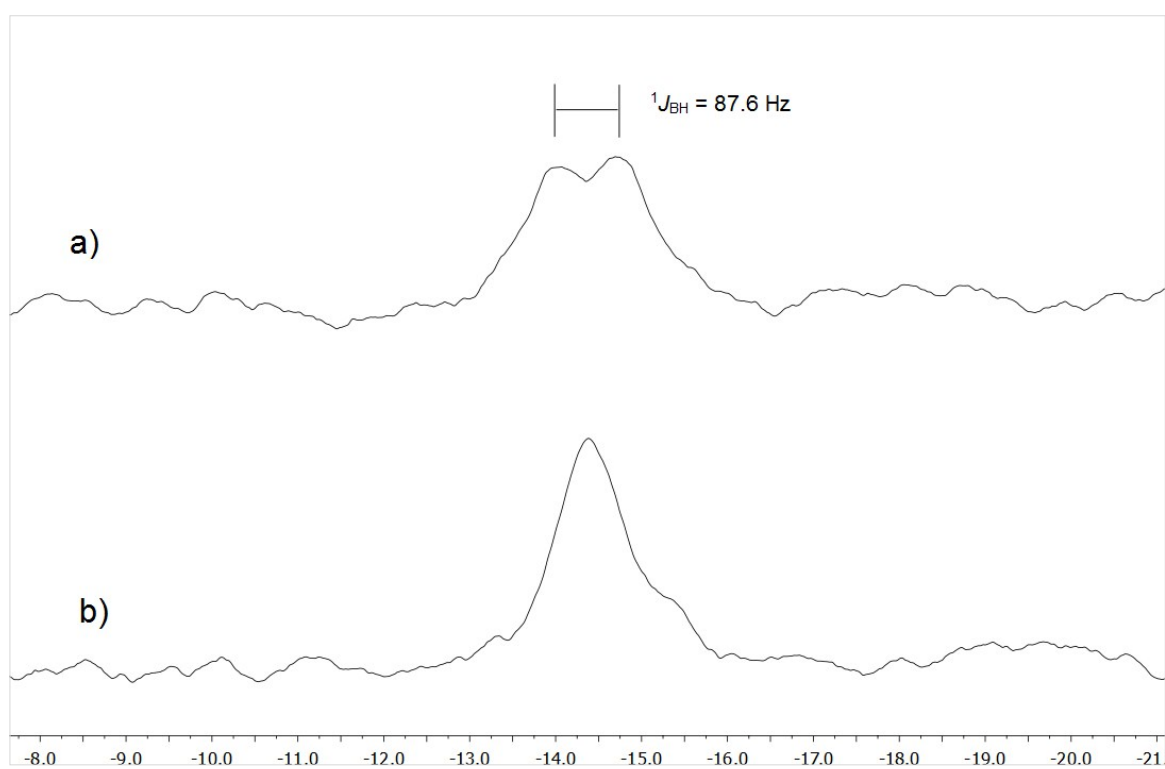

- $^{13}\text{C}$   $\{^1\text{H}\}$  NMR (THF- $d_8$ , \* indicates solvent peak)

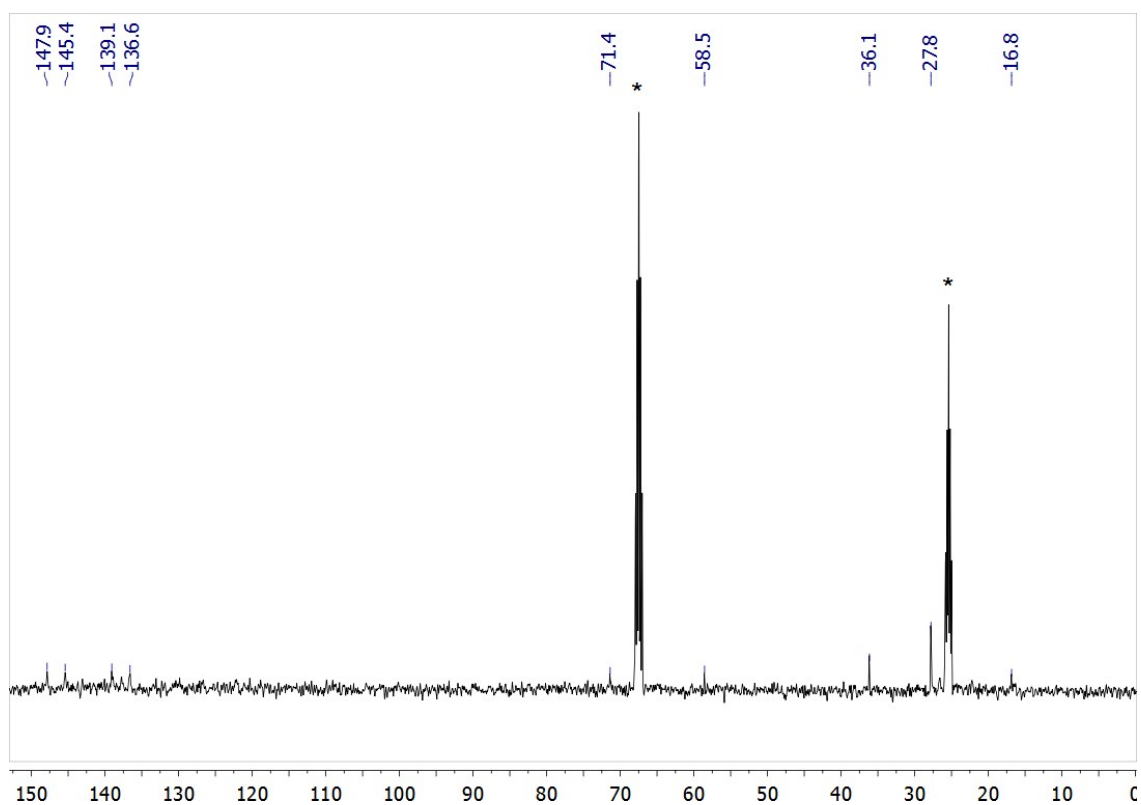

- 3.4 Polymerised THF solvent formed with  $\text{B}(\text{CH}(\text{C}_6\text{F}_5)_2)_3$  under  $\text{H}_2$   
(THF, \* indicates solvent peak)

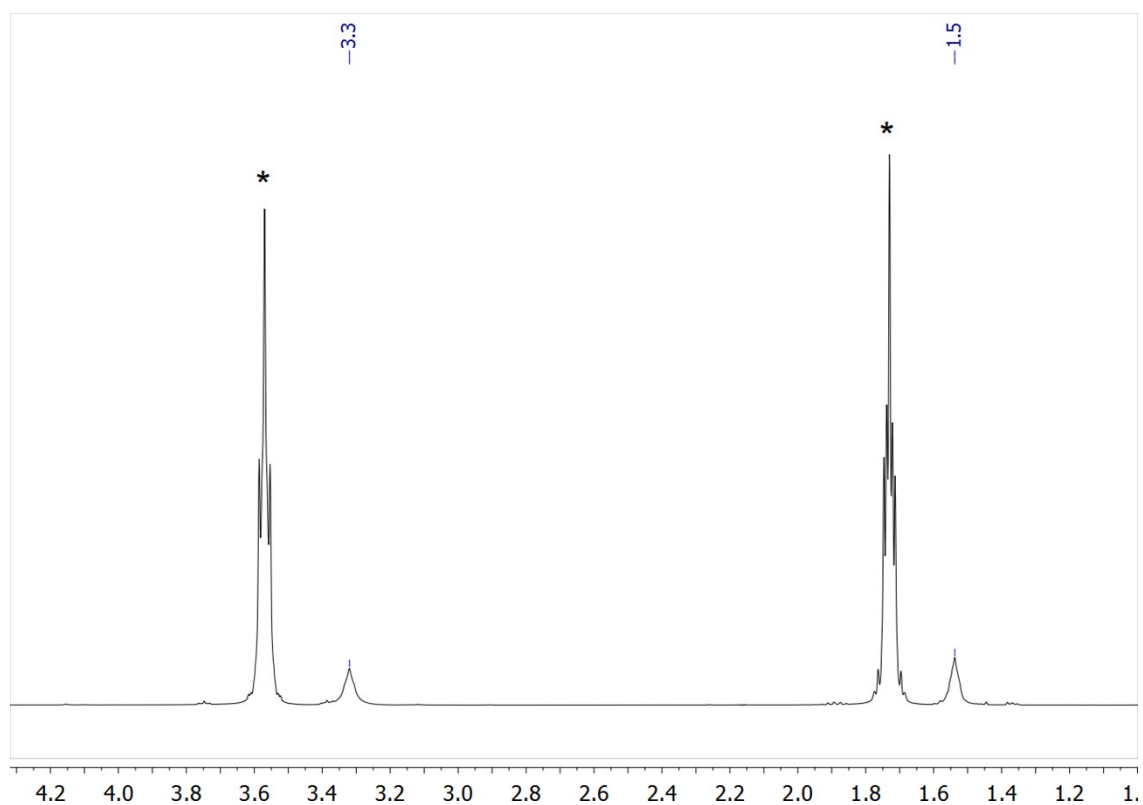

Supplement: c5dt00821b1.pdf [file c5dt00821b1.pdf]
